# Supplementary material
Source: Elsevier journal article supplement (https://authors.library.caltech.edu/38552/11/mmc5.xlsx)
Supplement: mmc5 [file mmc5.xlsx]

## Sheet: Sheet1
	Raw Data Table For Figure S5B. Related to Figure 5.
	Protein	shControl Fraction Newly Made Protein after 12 h	+ Error	- Error	shCand1 Fraction Newly Made Protein after 12 h	+ Error	- Error
	SKP2	0.321465	0.047447	0.0514426	0.351215	0.0538781	0.0579559
	SKP1	0.22918	0.0213355	0.0228288	0.230907	0.023502	0.0253042
	FBXO11	0.526956	0.0678873	0.066905	0.518057	0.0809534	0.0800165
	FBXO17	0.316005	0.027717	0.0290896	0.276077	0.0392723	0.0430618
	FBXO22	0.342812	0.0919455	0.105479	0.373271	0.12459	0.144033
	FBXO21	0.46411	0.0422984	0.0428211	0.4575	0.0479951	0.0487972
	FBXO3	0.351347	0.0530094	0.0569475	0.335145	0.0426753	0.0455517
	FBXL15	0.2544	0.0625317	0.0746142	0.323268	0.107873	0.130644
	FBXO7	0.346865	0.0551152	0.0595524	0.346105	0.0815446	0.0917159
	FBXO9	0.283609	0.0636892	0.0736857	0.236175	0.0553478	0.0660388
Figure S5B Peptide List
Peptide Sequence	Protein	Cell Line	SAX Fraction (pH)	Labeling	Peptide Retention Time (min)	% Newly Synthesized
ISIAHCDWVDGIAIR	FBXL15	shCand1	8	Light->Heavy	108.3	0.265084
ISIAHCDWVDGIAIR	FBXL15	shControl	6	Light->Heavy	107.93	0.280679
ISIAHCDWVDGIAIR	FBXL15	shControl	8	Light->Heavy	108.12	0.3336
SIVQIHIAGIR	FBXL15	shCand1	11	Light->Heavy	62.99	0.340065
SIVQIHIAGIR	FBXL15	shCand1	11	Heavy->Light	55.79	0.313234
SIVQIHIAGIR	FBXL15	shControl	8	Light->Heavy	66.95	0.256727
SIVQIHIAGIR	FBXL15	shControl	11	Light->Heavy	62.81	0.328138
SIVQIHIAGIR	FBXL15	shControl	8	Heavy->Light	57.94	0.284846
SIVQIHIAGIR	FBXL15	shControl	11	Heavy->Light	58.42	0.366126
IFSYIIEQDICR	FBXO11	shCand1	4	Light->Heavy	115.28	0.444136
IFSYIIEQDICR	FBXO11	shCand1	4	Heavy->Light	109.59	0.292836
IFSYIIEQDICR	FBXO11	shControl	4	Light->Heavy	114.24	0.286377
IFSYIIEQDICR	FBXO11	shControl	4	Heavy->Light	106.02	0.327188
DVSSWVGHYGAIVTHSSVR	FBXO17	shCand1	6	Light->Heavy	97.23	0.493491
